# Supplementary material for: Electrochemical and Mechanistic Study of Superoxide Scavenging by Pyrogallol in N,N-Dimethylformamide through Proton-Coupled Electron Transfer
Source: Preprints.org preprint supplement (doi:10.20944/preprints202201.0244.v1), 2022-01-17
Supplement: Supplementary file 1 [file supplementary]

Supplementary data for

# Electrochemical and Mechanistic Study of Superoxide Scavenging by Pyrogallol in *N,N*-Dimethylformamide through Proton-Coupled Electron Transfer

Tatsushi Nakayama <sup>1\*</sup>, Ryo Honda <sup>2</sup>, Kazuo Kuwata <sup>2</sup>, Shigeyuki Usui <sup>1</sup>, and Bunji Uno <sup>3</sup>

<sup>1</sup> Department of Pharmacy, Gifu Pharmaceutical University, 1-25-4 Daigaku-nishi, Gifu 501-1196, Japan

<sup>2</sup> United Graduate School of Drug Discovery and Medical Information Sciences, Gifu University, 1-1 Yanagido, Gifu 501-1193, Japan

<sup>3</sup> Faculty of Pharmacy, Gifu University of Medical Science, 4-3-3 Nijigaoka, Kani, Gifu 509-0923, Japan

\* Correspondence: [tnakayama@gifu-pu.ac.jp](mailto:tnakayama@gifu-pu.ac.jp)

## Table of contents

|             |                                                                                                                                                                                                    |
|-------------|----------------------------------------------------------------------------------------------------------------------------------------------------------------------------------------------------|
| Pages S2    | Table S1: CV parameters                                                                                                                                                                            |
| Pages S3    | Figure S1: Scheme of in situ electrolytic ESR system                                                                                                                                               |
| Pages S3-S4 | Table S2-S5: $\Delta G^\circ$ values ( $\text{kJ mol}^{-1}$ ) for the PCET reaction in acetonitrile, dimethyl sulfoxide, water, and vacuum                                                         |
| Pages S5    | Figure S2: Energy profile along IRC of 2PCET between $\text{CatH}_2$ and $\text{O}_2^{\cdot-}$<br>Figure S3: Energy profile along IRC of 2PCET between $\text{MoCatH}_2$ and $\text{O}_2^{\cdot-}$ |

**Table S1.** CV parameters

|                                                                |                                                          |                                              |                                |
|----------------------------------------------------------------|----------------------------------------------------------|----------------------------------------------|--------------------------------|
| Working Electrode Planar Radius 1.0 mm diameter                |                                                          |                                              |                                |
| Geometry<br>Spherical (Hemispherical) <sup>1</sup>             | Diffusion<br>Semi-infinite 1D                            | Temperature<br>298.3 K                       |                                |
| Charge Transfer Reaction                                       |                                                          |                                              |                                |
| O <sub>2</sub> + e <sup>-</sup> ↔ O <sub>2</sub> <sup>•-</sup> | Redox Potential (V vs Fc <sup>+</sup> /Fc)               | Coefficient                                  | Kinetics (cm s <sup>-1</sup> ) |
|                                                                | $E = -1.284$                                             | $\alpha = 0.005$                             | $k_s = 0.00927$                |
| Species                                                        |                                                          |                                              |                                |
|                                                                | Diffusion Coefficient (cm <sup>2</sup> s <sup>-1</sup> ) | Initial Concentration (mol L <sup>-1</sup> ) |                                |
| O <sub>2</sub>                                                 | $4.76 \pm 0.24 \times 10^{-5}$                           | 0.0048                                       |                                |
| O <sub>2</sub> <sup>•-</sup>                                   | $2.15 \pm 0.24 \times 10^{-5}$                           | 0                                            |                                |

<sup>1</sup>Operating conditions were spherical diffusion (to mimic edge diffusion to the disk)

<sup>2</sup>DigiElch 4.5 ElchSoft inc. (Digital CV Simulation Software)

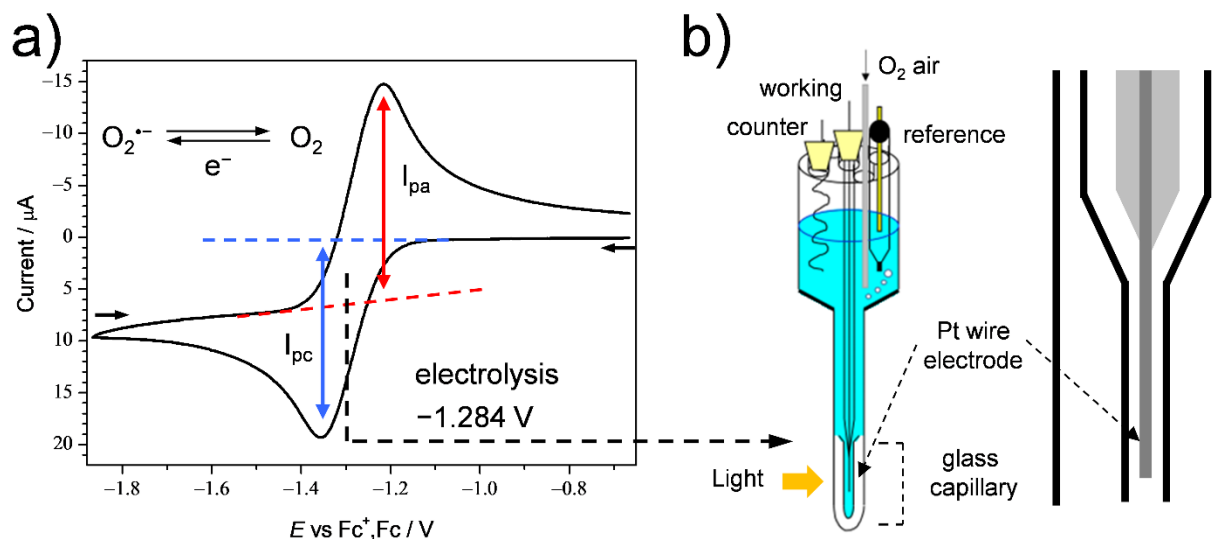

**Figure S1.** In situ electrolytic ESR spectral system. (a) Cyclic voltammograms of  $O_2/O_2^{\bullet-}$  for potential determination. (b) In situ ESR system, composed of an electrochemical ESR cell with a glass small tip, air tube for  $O_2$  bubbling, and three electrode system using a 0.5-mm-diameter straight Pt wire sealed in a glass capillary as working electrode.

**Table S2.**  $\Delta G^0$  values ( $\text{kJ mol}^{-1}$ ) for the PCET reaction between  $O_2^{\bullet-}$  and the compounds (CatH<sub>2</sub>, PyH<sub>3</sub>, and MoCatH<sub>2</sub>) in acetonitrile, calculated using (U)B3LYP/PCM/6-311+G(3df,2p) methods.

|                     | PT1  | PT2    | PT3   | PT4   | ET1   | ET2  | ET3    | PCET  | 2PCET |
|---------------------|------|--------|-------|-------|-------|------|--------|-------|-------|
| CatH <sub>2</sub>   | 19.3 | -365.4 | 378.5 | -78.9 | 408.0 | 23.2 | -434.2 | -55.7 | -36.3 |
| PyH <sub>3</sub>    | 17.8 | -360.2 | 358.9 | -67.9 | 406.4 | 28.3 | -398.5 | -39.5 | -21.7 |
| MoCatH <sub>2</sub> | 46.0 | -336.5 | 380.6 | -92.5 | 396.1 | 13.4 | -459.6 | -79.0 | -32.9 |

**Table S3.**  $\Delta G^\circ$  values ( $\text{kJ mol}^{-1}$ ) for the PCET reaction between  $\text{O}_2^{\bullet-}$  and the compounds (CatH<sub>2</sub>, PyH<sub>3</sub>, and MoCatH<sub>2</sub>) in dimethyl sulfoxide, calculated using (U)B3LYP/PCM/6-311+G(3df,2p) methods.

|                     | PT1  | PT2    | PT3   | PT4   | ET1   | ET2  | ET3    | PCET  | 2PCET |
|---------------------|------|--------|-------|-------|-------|------|--------|-------|-------|
| CatH <sub>2</sub>   | 19.8 | -358.5 | 385.8 | -78.3 | 400.9 | 22.5 | -441.5 | -55.7 | -35.9 |
| PyH <sub>3</sub>    | 18.2 | -353.3 | 353.1 | -67.2 | 399.3 | 27.6 | -392.6 | -39.5 | -21.2 |
| MoCatH <sub>2</sub> | 46.0 | -329.9 | 374.4 | -92.0 | 389.0 | 13.0 | -453.5 | -79.0 | -32.9 |

**Table S4.**  $\Delta G^\circ$  values ( $\text{kJ mol}^{-1}$ ) for the PCET reaction between  $\text{O}_2^{\bullet-}$  and the compounds (CatH<sub>2</sub>, PyH<sub>3</sub>, and MoCatH<sub>2</sub>) in water, calculated using (U)B3LYP/PCM/6-311+G(3df,2p) methods.

|                     | PT1  | PT2    | PT3   | PT4   | ET1   | ET2  | ET3    | PCET  | 2PCET |
|---------------------|------|--------|-------|-------|-------|------|--------|-------|-------|
| CatH <sub>2</sub>   | 20.3 | -349.5 | 378.1 | -77.5 | 391.6 | 21.7 | -434.0 | -55.8 | -35.4 |
| PyH <sub>3</sub>    | 18.8 | -344.3 | 345.5 | -66.2 | 390.0 | 26.8 | -384.9 | -39.4 | -20.5 |
| MoCatH <sub>2</sub> | 46.0 | -321.4 | 366.4 | -91.5 | 379.9 | 12.4 | -445.5 | -79.0 | -33.0 |

**Table S5.**  $\Delta G^\circ$  values ( $\text{kJ mol}^{-1}$ ) for the PCET reaction between  $\text{O}_2^{\bullet-}$  and the compounds (CatH<sub>2</sub>, PyH<sub>3</sub>, and MoCatH<sub>2</sub>) in vacuum, calculated using (U)B3LYP/PCM/6-311+G(3df,2p) methods.

|                     | PT1   | PT2     | PT3    | PT4    | ET1    | ET2   | ET3     | PCET  | 2PCET  |
|---------------------|-------|---------|--------|--------|--------|-------|---------|-------|--------|
| CatH <sub>2</sub>   | -60.4 | -1385.1 | 1279.3 | -159.8 | 1444.0 | 119.3 | -1319.8 | -40.4 | -100.9 |
| PyH <sub>3</sub>    | -66.9 | -1374.7 | 1212.8 | -170.9 | 1437.1 | 129.3 | -1254.4 | -41.6 | -108.5 |
| MoCatH <sub>2</sub> | -6.0  | -1323.8 | 1241.7 | -180.3 | 1417.8 | 100.0 | -1322.1 | -80.3 | -86.4  |

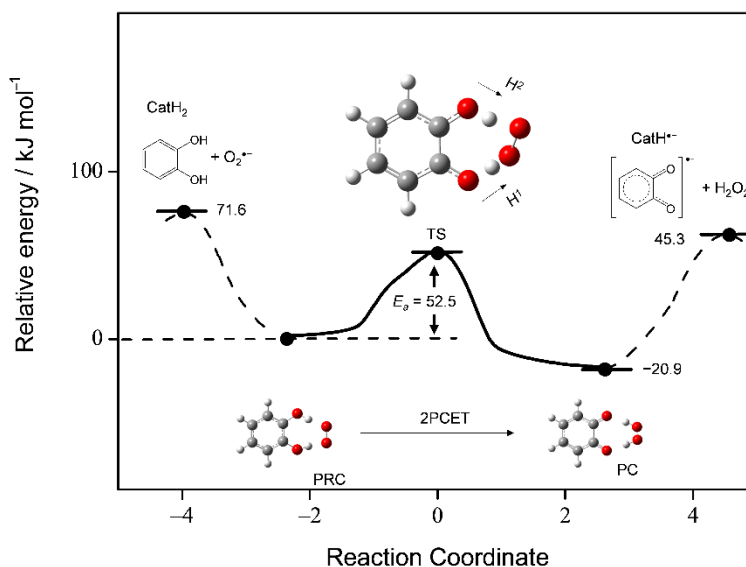

**Figure S2.** Energy profile ( $\text{kJ mol}^{-1}$ ) along the IRC of the 2PCET between  $\text{CatH}_2$  and  $\text{O}_2^{\bullet-}$  in DMF with structures of FRs ( $\text{CatH}_2$ ,  $\text{O}_2^{\bullet-}$ ), PRC ( $\text{CatH}_2\text{-O}_2^{\bullet-}$ ), TS, PC ( $\text{Cat}^{\bullet-}\text{-H}_2\text{O}_2$ ), and FPs ( $\text{Cat}^{\bullet-}$ ,  $\text{H}_2\text{O}_2$ ), calculated using DFT-(U)B3LYP/PCM/6-311+G(3df,2p) method.

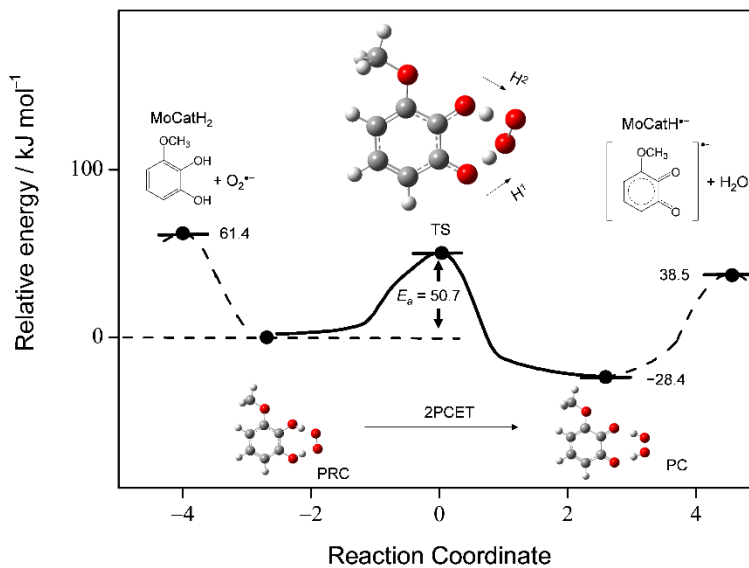

**Figure S3.** Energy profile ( $\text{kJ mol}^{-1}$ ) along the IRC of the 2PCET between  $\text{MoCatH}_2$  and  $\text{O}_2^{\bullet-}$  in DMF with structures of FRs ( $\text{MoCatH}_2$ ,  $\text{O}_2^{\bullet-}$ ), PRC ( $\text{MoCatH}_2\text{-O}_2^{\bullet-}$ ), TS, PC ( $\text{MoCat}^{\bullet-}\text{-H}_2\text{O}_2$ ), and FPs ( $\text{MoCat}^{\bullet-}$ ,  $\text{H}_2\text{O}_2$ ), calculated using DFT-(U)B3LYP/PCM/6-311+G(3df,2p) method.

**Table S6.** Optimized geometry of complexes (PRC, TS, and PC) formed along the 2PCET between PyH<sub>3</sub> and O<sub>2</sub><sup>•-</sup> calculated using DFT-(U)B3LYP/PCM/6-311+G(3df,2p) in DMF.

| Center Number | Atomic Number | Coordinates (Angstroms) |          |          |
|---------------|---------------|-------------------------|----------|----------|
|               |               | X                       | Y        | Z        |
| -----         |               |                         |          |          |
| -PRC-----     |               |                         |          |          |
| 1             | 6             | 1.181897                | -1.84196 | -0.06596 |
| 2             | 6             | 0.06826                 | -1.03843 | 0.202336 |
| 3             | 6             | 0.221736                | 0.356216 | 0.22686  |
| 4             | 6             | 1.486161                | 0.908188 | -0.01953 |
| 5             | 6             | 2.592423                | 0.110095 | -0.27751 |
| 6             | 6             | 2.426881                | -1.27204 | -0.29633 |
| 7             | 1             | 1.047691                | -2.91533 | -0.08233 |
| 8             | 1             | 3.554319                | 0.569762 | -0.45842 |
| 9             | 1             | 3.277846                | -1.90975 | -0.49659 |
| 10            | 8             | 1.616241                | 2.268443 | 0.016273 |
| 11            | 1             | 0.733112                | 2.622022 | 0.203096 |
| 12            | 8             | -0.76731                | 1.237787 | 0.548122 |
| 13            | 1             | -1.66049                | 1.069864 | 0.077844 |
| 14            | 8             | -1.11312                | -1.64656 | 0.472696 |
| 15            | 1             | -1.92325                | -1.09988 | 0.236284 |
| 16            | 8             | -3.30296                | -0.42191 | -0.26998 |
| 17            | 8             | -3.04453                | 0.853596 | -0.5295  |
| -----         |               |                         |          |          |
| -TS-----      |               |                         |          |          |
| 1             | 6             | 1.481072                | 0.891171 | 0.059877 |
| 2             | 6             | 0.201635                | 0.388281 | -0.25156 |
| 3             | 6             | -0.02594                | -1.03381 | -0.30444 |
| 4             | 6             | 1.092044                | -1.87109 | -0.03328 |
| 5             | 6             | 2.330801                | -1.34326 | 0.259256 |
| 6             | 6             | 2.542867                | 0.045301 | 0.310444 |
| 7             | 1             | 0.936235                | -2.94151 | -0.06901 |
| 8             | 1             | 3.163025                | -2.00692 | 0.456686 |
| 9             | 1             | 3.516047                | 0.456834 | 0.539721 |
| 10            | 8             | -1.19241                | -1.50821 | -0.5994  |

|       |   |          |          |          |
|-------|---|----------|----------|----------|
| 11    | 1 | -2.23727 | -0.9208  | 0.281739 |
| 12    | 8 | -0.73629 | 1.294887 | -0.54229 |
| 13    | 1 | -1.73773 | 1.015622 | -0.32236 |
| 14    | 8 | -2.94759 | -0.39799 | 0.81965  |
| 15    | 1 | 0.79236  | 2.643126 | -0.10118 |
| 16    | 8 | 1.653703 | 2.246055 | 0.095463 |
| 17    | 8 | -3.04835 | 0.777028 | 0.098148 |
| ----- |   |          |          |          |
| -PC   |   |          |          |          |
| 1     | 6 | -1.6067  | 0.918052 | -0.0358  |
| 2     | 6 | -0.25561 | 0.405283 | -0.01653 |
| 3     | 6 | -0.06345 | -1.05977 | 0.029501 |
| 4     | 6 | -1.24505 | -1.86692 | 0.065874 |
| 5     | 6 | -2.49639 | -1.30811 | 0.049218 |
| 6     | 6 | -2.69765 | 0.096077 | -0.00316 |
| 7     | 1 | -1.114   | -2.94054 | 0.103607 |
| 8     | 1 | -3.36738 | -1.95084 | 0.075757 |
| 9     | 1 | -3.696   | 0.511511 | -0.01592 |
| 10    | 8 | 1.099258 | -1.56706 | 0.037436 |
| 11    | 1 | 2.574259 | -0.86554 | -0.27943 |
| 12    | 8 | 0.696442 | 1.246655 | -0.0428  |
| 13    | 1 | 2.349146 | 1.007136 | 0.296185 |
| 14    | 8 | 3.42224  | -0.37527 | -0.45585 |
| 15    | 1 | -0.80768 | 2.60238  | -0.09488 |
| 16    | 8 | -1.72331 | 2.270097 | -0.08428 |
| 17    | 8 | 3.286694 | 0.741594 | 0.467989 |
| ----- |   |          |          |          |
